# Supplementary material for: Silencing of EEF2K (eukaryotic elongation factor-2 kinase) reveals AMPK-ULK1-dependent autophagy in colon cancer cells
Source: PubMed Central journal article supplement — Autophagy. 2014 Jun 19;10(9):1495–508. doi: 10.4161/auto.29164 (PMC4206530; doi:10.4161/auto.29164), 2014-06-19
Supplement: auto-10-1495-s01.pdf [file auto-10-1495-s01.pdf]

## **Supplemental Material to:**

**Chuan-Ming Xie, Xiao-Yu Liu, Kathy WY Sham,  
Josie MY Lai, and Christopher HK Cheng**

**Silencing of EEF2K (eukaryotic elongation factor-2  
kinase) reveals AMPK-ULK1-dependent autophagy  
in colon cancer cells**

**Autophagy 2014; 10(9)**

**<http://dx.doi.org/10.4161/auto.29164>**

**[www.landesbioscience.com/journals/autophagy/article/29164](http://www.landesbioscience.com/journals/autophagy/article/29164)**

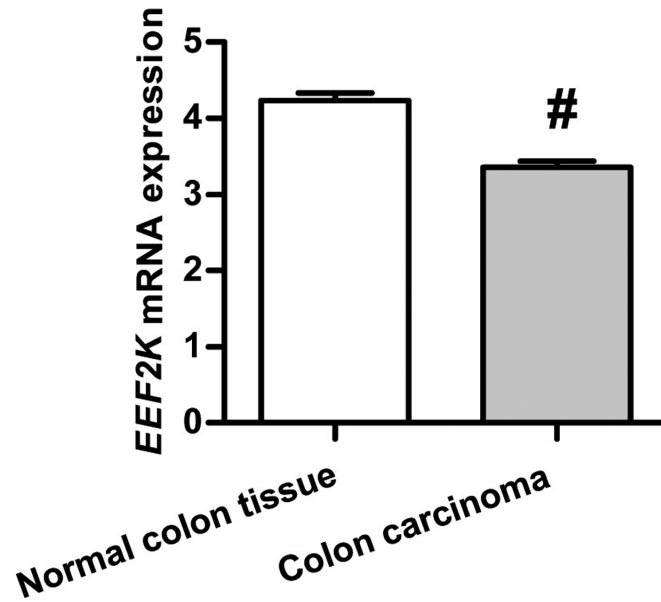

**Figure S1.** Assessment of *EEF2K* mRNA expression in both normal and colon carcinoma tissues in previously published gene expression microarray data.<sup>43</sup> *EEF2K* (225545\_at) data extracted from [www.oncomine.org](http://www.oncomine.org) and expressed as log2 median-centered intensity. *EEF2K* expression is significantly decreased in colon cancer (<sup>#</sup> $P < 0.001$ ).
